# Supplementary material for: Mechanisms and functional roles of glutamatergic synapse diversity in a cerebellar circuit
Source: eLife. 2016 Sep 19;5:e15872. doi: 10.7554/eLife.15872 (PMC5074806; doi:10.7554/eLife.15872)
Supplement: Figure 1—source data 1. — Data in the L/M tab are raw data for each cell of the experimental set. Other numbers are averages across cells. DOI: http://dx.doi.org/10.7554/eLife.15872.004 [file elife-15872-fig1-data1.xlsx]

## Sheet: Figure1-PanelsD-E
1Hz MF modulation OFF cells
	Phase shift	Amplitude	spike concentration factor k (1/σ)
1	-58.6577	13.7397	3.80952
2	-81.9808	27.0077	3.0003
3	-84.2615	24.1858	3.72162
4	-69.8428	4.87024	0.000737931
5	-129.715	14.3874	1.94515
6	-138.498	23.0043	2.88767
7	-40.4086	5.52824	1.17165
8	-83.9107	25.2137	3.02389
9	-85.634	5.78432	26.6667
10	-45	2.46255	3.00481
11	-76.2965	9.90386	1.09721
12	-76.2965	9.90386	1.09721
13	-44.0802	1.94954	14.8368
14	-65.2089	6.10447	2.96209
15	-106.684	1.97019	0.0127648
16	-103.522	16.3488	2.03293
17	-115.155	10.7296	1.81028
18	-87.7478	12.3386	1.0582
19	-110.487	12.8146	3.48068
20	-122.101	12.1999	2.87274

## Sheet: Figure1-PanelsI-J
1Hz MF modulation ON cells
	Phase shift	Amplitude	spike concentration factor k (1/σ)
1	138.823	22.6245	1.108770374
2	138.49	19.3563	0.155874926
3	175.265	16.8404	0.000666952656
4	138.976	21.1792	1.195886152
5	-61.1996	32.4434	2.721088435
6	49.379	9.78261	0.0006268677525
7	-164.361	6.67341	0.0003369593983
8	68.2248	4.55722	0.004155795797
9	80.2906	15.4905	0.001079936815
10	-151.603	5.22152	0.5596910505
11	-99	7.88802	5.417118093
12	176.035	2.00837	0.497116723
13	136.426	9.09399	0.0008135026471
14	-12.2555	13.0329	1.074229241
15	132.413	9.47767	0.0007153286635
16	160.236	3.90959	0.000871538912
17	-59.8513	7.73108	5.01002004
18	26.3185	1.6454	0.00472920121
19	-20.5891	8.21327	0.630636312
20	51.9066	9.28974	1.147446931
21	173.561	25.3041	0.7956082425
22	99.5892	11.4884	0.0007433618346

## Sheet: Figure1-PanelsL-M
1 Hz sinusoidal currents injections (±30pA)
Holding current (pA)	Phase shift
0	-13.3106	-22.7541	-27.0922	-11.9498	-16.617	-9.97378	5.01561	-11.8498	-16.2668	-39.8171	-14.4562	-13.9415	-23.6009	-26.3823	-23.5234	-14.8129	-21.5515	-14.0235	-19.6666
20		-8.00518	-18.1654	-7.4758	-10.6021	-4.47851	-27.6385	-7.70822	-9.35039	-27.9236	-10.5467	-18.3667	-17.2988	-16.4586	-0.814429	-9.56289	-13.2539	-4.45744	-12.6098
40	-11.7521	-9.20698	-15.2921	-9.71569	-9.57904	-8.05718	-15.6409	-6.37078	-7.3739	-16.3047	-10.0754	-33.8477	-6.30184	-9.89239	-18.6245	-8.78163	-7.46668	-5.17469	-10.4203
60		-82.5661	-62.0003	-13.9448	-17.7452	-5.83074	-9.24062	-10.3271	-7.47296	-9.61466	-3.29747	-48.2428	-6.96942	-7.76363	-2.60923	-8.63322	-13.0925	-10.2878	-5.1381
80	-10.4443		-118.809	-15.207	-22.7892	-21.7116	-10.2791	-12.2807	-10.0981	-13.1979	-3.92032	-62.6551	-10.5217	-6.01537	-142.862	-7.36604	-7.28699	-10.2878	0.331703
100				-23.0135	-19.714		-6.97602	-10.0117	-10.0618	-12.0988	0.416212	-65.6313	-10.6821	-5.57077		-8.68251	-12.4868	-14.2888	2.15845
120	-11.8137			-24.3752	-22.3756		-6.97602	-14.6807	-18.4327	-13.493	3.07536	-57.5679	-12.1454	-7.15024		-2.37443	-26.941		-0.357003
140				-30.5377	-30.6565		-6.04739	-9.60024		-11.0517	2.33486		-14.709	-6.69249		-23.7816	-58.0056
160	-7.87742			-38.361	-40.7267		-5.50887	-11.366		-8.1597	-7.65847		-9.37311	-8.61575		-17.5871	-84.9589
180	-12.8621			-72.4101	-47.7223		-7.07154	-8.47294		-11.422	-1.66413		-9.23824	-3.28479		-90
200				-129.598	-84.459		-6.60066	-4.15434		-12.1497	-10.409		-7.32723	-1.3979
220					-113.666		-7.12629	-3.91257		-8.37509	0.383274		-8.67108	-10.0051
240					-115.203		-5.21357	8.18962		-5.44168	-25.5547		-16.2638	-10.0051
260					-90		-3.27255	8.60389		-6.52827			-24.2222	0.166013
280							-18.1481	-19.4201		-4.68007			-21.7047	-5.6485
300										-4.02454				-105.907
Holding current (pA)	Amplitude of modulation
0	29.5018	47.1302	35.9133	21.8079	25.5478	20.3796	7.22748	39.6811	40.9525	18.192	28.1404	18.2499	31.4493	32.5934	44.849	23.3204	30.2164	38.2048	31.0013
20		59.776	28.7369	30.8607	19.7133	41.2169	48.2154	25.5127	55.7343	27.747	28.9166	20.7887	36.4474	37.7672	21.6938	21.5698	34.0219	31.0507	40.1449
40	45.1761	66.1476	25.3804	32.8753	39.219	20.1534	25.12	24.3867	62.1768	27.0994	34.4901	20.2155	23.1117	44.2643	28.6194	26.7203	24.5778	25.5939	53.502
60		54.3591	65.2604	28.802	37.2596	43.6274	23.5902	28.0754	60.5323	34.2897	28.4424	17.4981	43.6553	45.7235	55.4145	19.2233	25.2227	26.9868	62.4148
80	56.1271		37.6969	29.3909	30.8767	21.1896	23.8548	23.5161	25.265	53.3542	25.6205	14.3214	46.8811	47.9102	3.78057	17.9232	22.8468	26.9868	25.5721
100				26.5662	19.7787		33.6576	23.5816	59.3242	29.5071	22.5508	7.61629	49.8063	48.9609		29.4375	20.1175	24.6395	28.2233
120	23.3357			28.9522	19.913		33.6576	24.1412	20.4457	65.1294	22.9256	8.71578	52.1919	48.7582		19.1443	38.6378		22.6985
140				32.1815	19.9883		28.362	24.3332		67.0986	21.5578		26.7508	50.0207		19.9012	37.3082
160	25.33			35.2337	29.2674		24.2504	25.3076		68.5091	22.611		22.7336	49.8448		50.4089	31.7268
180	27.1442			28.232	31.2473		24.7606	25.112		66.8987	24.1907		29.3872	28.4766		3.47708e-09
200				1.22511	27.0906		23.5259	23.8382		59.0842	19.8284		18.7492	19.6769
220					17.0685		23.1181	24.9298		29.5741	36.3263		20.8218	18.5017
240					4.62649		22.8304	93.5785		21.2164	41.2547		27.8976	18.5017
260					3.47708e-09		24.4914	23.7405		22.3101			23.3104	15.9093
280							18.7862	21.4288		22.8841			21.9619	15.533
300										24.6196				22.4616
Holding current (pA)	σ
0	0.729879	1.66613	0.821663	0.79247	0.962968	7.31317	2389.6	0.695866	1.09115	0.583726	1.63602	96.0825	0.947874	0.79703	2.72809	1.40548	1.44819	1.26664	1.14072
20		1.90677	1.9681	1.90531	4.86601	5.29352	0.481313	1.76688	2.02925	1.38111	2.08473	1.78144	2.35435	1.31411	8.42531	29.0541	3.61634	12.7478	1.38992
40	1.14611	2.14673	4.40182	1.97871	4.02632	8.61488	2.68494	10.3422	5.40991	2.63251	10.3228	1.744	7.31626	5.68465	21.0771	671.819	41.8094	10.8115	3.17705
60		0.516876	0.391625	1.15868	7.75307	2.33539	10.8479	2.51644	3.54032	4.09174	7.60085	48.7493	2.09048	3.31032	2.91932	7.88671	31.3197	16.6187	5.23916
80	1.81659			1.35839	1.81241	9.92041	10.8558	3.61637	10.3116	1.54511	9.67954	85.5064	5.15122	2.94123	0.41154	25.7687	53.2368	16.6187	30.536
100				1.19469	8.46335		9.16363	4.13753	52.3463	2.13167	10.9234	0.925311	61.8427	5.17797		5.00754	22.7009	9.68699	82.3576
120	12.2592			1.44095	9.06464		9.16363	13.0605	7.41365	1.67864	11.4867	0.0376059	2.5251	10.9239		31.4271	1.72508		7.4067
140				1.71009	3.8669		10.3575	12.4113		1.75715	48.3763		9.44834	2.62872		7.49416	1.19646
160	14.8784			1.32316	1.07729		9.91937	13.3005		2.26829	6.79954		11.3623	26.5754		3.43497	0.881399
180	7.76752			0.922088	1.14407		10.1836	13.502		2.31354	97.292		30.0379	28.6026		1
200				0.0460354	0.582059		9.38438	6.3966		2.90603	58.2103		87.7195	267.485
220					0.586549		8.48553	5.40539		6.38087	463.007		111.467	1490.62
240					0.595813		8.03402	2.97882		10.9112	0.778717		3.03662	1490.62
260					1		12.1906	8.07425		26.7447			9.09748	4418.35
280							13.78	7.9357		26.5646			24.5399	3957.93
300										94.7145				8.77659
