# Supplementary material for: Mechanisms and functional roles of glutamatergic synapse diversity in a cerebellar circuit
Source: eLife. 2016 Sep 19;5:e15872. doi: 10.7554/eLife.15872 (PMC5074806; doi:10.7554/eLife.15872)
Supplement: Figure 2—source data 1. — Each column of the D tab represents raw data for a cell of the experimental set. Other numbers are averages across cells. DOI: http://dx.doi.org/10.7554/eLife.15872.006 [file elife-15872-fig2-data1.xlsx]

## Sheet: Figure2-PanelB
AMPA Component
Peak (pA)	Steady state (pA)
0	0
0	0
0	0
0	0
0	0
0	0
0	0
0	0
0	0
0	0
0	0
0	0
0	0
20.5	11.5
16.3	3.7
16.6	8.9
6.3	20.5
6.6	8.2
101	4.2
13.1	3.1
49.8	3.1
103.2	8.2
84.9	50.6
47.6	20.2
34.4	10.6
60.1	5.0
9.9	14.7

## Sheet: Figure2-PanelD
		mGluR2 Steady state current (pA)
MF stimulation (Hz)	10	65.9	15.5	54.4	54.7		18.9		58.4	12.1	24.7						91	19.3
	20	97.6	40.6	113.1	63.9		31.7	20	102.9	21.2			47.6	45.9	43.6	26.4	139.6	49.5
	50				93.1	109.8	51.7	28.89	107.5	59.4	81.2	90.7	76.2	63.8	83.9	44.5	153.9	65.8
	100	141.07	172.6	192	163.3	133.5	56.6	68.2235	164.3	110.2	137.5	151.8	88.34	77.6			170.2	121.6

## Sheet: Figure2-PanelE
τ decay (s)	phase shift at 1 HZ MF stimulation
315	0.47011
283.703	0.50422
283.703	0.45353
315.92	0.50952
294.791	0.30163
256.478	0.10555
249.512	0.21116
237.899	0.14526
301.342	0.28219
278.019	0.22564
290.157	0.38317
230.285	0.16158
319.591	0.2005
276.089	0.1887
274.366	0.2524

## Sheet: Figure2-PanelF
K 1/2 (1/σ)	rise time (s)
3.005	0.276
1.097	0.267
1.097	0.247
2.962	0.266
0.013	0.362
2.033	0.270
1.810	0.374
1.058	0.459
3.480	0.163
2.872	0.217
3.809	0.138
3.000	0.150
3.721	0.047
0.001	0.294
1.945	0.353
2.887	0.196
1.171	0.179
3.023	0.166

## Sheet: Figure2-PanelI
MF modulation 03 Hz		MF modulation 1 Hz		MF modulation 3 Hz
Modulated amplitude Hz	phase shift	Modulated amplitude Hz	phase shift	Modulated amplitude Hz	phase shift
8.16715	133.442	-	-	-	-
-	-	13.7397	302	-	-
2.02435	83.76	-	-	-	-
4.15287	186.201	27.0077	278.019	-	-
2.94668	230.82	4.87024	290.157	5.03009	393
4.25717	209.845	14.3874	230.285	-	-
16.5238	231.143	23.0043	221.502	-	-
1.10688	213.37	5.52824	319.591	-	-
7.28365	192.613	25.2137	276.089	10.1545	341
0.768369	204.882	5.78432	274.366	0.777807	408
6.50383	214.438	2.46255	315	-	-
4.04754	213.179	9.90386	283.703	0.387659	391
9.66374	199.179	9.90386	283.703	-	-
21.1778	247.801	1.94954	315.92	-	-
8.40793	202.323	6.10447	294.791	-	-
1.78863	221.939	1.97019	253.316	2.70943	327
-	-	16.3488	256.478	-	-
1.15591	198.886	10.7296	244.845	0.387004	375
7.90988	212.407	12.3386	272.252	-	-
-	-	12.8146	249.513	-	-
3.04282	189.216	12.1999	237.899	0.774811	359
