# Supplementary material for: Mechanisms and functional roles of glutamatergic synapse diversity in a cerebellar circuit
Source: eLife. 2016 Sep 19;5:e15872. doi: 10.7554/eLife.15872 (PMC5074806; doi:10.7554/eLife.15872)
Supplement: Figure 3—source data 1. — Each line is the result for a cell of the experimental set. DOI: http://dx.doi.org/10.7554/eLife.15872.008 [file elife-15872-fig3-data1.xlsx]

## Sheet: Panel C 
AMPA component
τ decay 1st EPSC (s)	peak last / peak 1st EPSC
0.0015	0.149
0.0011	0.296
0.0018	0.499
0.0026	0.482
0.0018	1.01
0.0012	0.108
0.0006	0.059
0.0007	0.005
0.0013	0.048
0.0008	0.012
0.0048	0.755
0.0015	0.302
0.0022	0.459
0.0022	0.080
0.002	0.236
0.001	0.071
0.0016	0.274
0.001	0.081
0.0017	0.143
0.0068	1.426
0.0009	0.355

## Sheet: Panel E
AMPA component
Charge fast EPSC (pC)	Buildup current (pA)
0.196	53.5
0.012	30.6
0.123	78.9
0.056	47.28
0.027	62.8
0.051	83.3
0.130	81.7
0.136	138.1
0.127	63.7
0.109	19.6
0.023	32.9
0.083	0
0.209	1.6
0.052	2.8
0.114	0
0.032	9.2
0.158	0
0.088	0
0.043	42.4
0.008	8.9

## Sheet: Panel G
AMPA component
Rebound current (pA)	τ rise rebound (s)
50.7	0.093
32	0.064
49.2	0.067
31.7	0.097
38.1	0.049
19.2	0.029
34.3	0.076
31.6	0.054
37.5	0.039
49.9	0.054
66.9	0.061
30.8	0.064
10.5	0.032
22.9	0.055
5	0.025
12.4	0.042
29.5	0.099
12.6	0.046
16.4	0.033
4.8	0.029
29.3	0.034
18.7	0.028
2.7	0.034

## Sheet: Panel H
AMPA component
Rebound current (pA)	Charge fast EPSC (pC)
49.2	0.196
31.7	0.012
38.1	0.123
19.2	0.056
34.3	0.027
31.6	0.051
37.5	0.130
66.9	0.136
30.8	0.127
10.5	0.109
22.9	0.023
12.4	0.083
29.5	0.209
12.6	0.052
16.4	0.114
4.8	0.032
29.3	0.158
18.7	0.089
0.2	0.043
2.7	0.008

## Sheet: Panel K
AMPA component
Control		Cyclothiazide
Charge during stimulation (pC)	Rebound current (pA)	Charge during stimulation (pC)	Rebound current (pA)
7.32	39.6	13.36	18.7
1.87	3.3	3.23	0
2.54	9.3	4.78	0
5.31	36.3	8.60	8.9
2.95	6.3	3.64	1.4
3.06	24.2	9.58	3.1
2.86	18.6	6.53	3.7
5.75	8.3	9.79	3.2
3.27	19.2	7.41	5.9
3.58	13.4	6.28	5.7
1.82	10.5	4.87	5.6
