# Supplementary material for: Mechanisms and functional roles of glutamatergic synapse diversity in a cerebellar circuit
Source: eLife. 2016 Sep 19;5:e15872. doi: 10.7554/eLife.15872 (PMC5074806; doi:10.7554/eLife.15872)
Supplement: Figure 4—source data 1. — Each line is the result for a cell of the experimental set. DOI: http://dx.doi.org/10.7554/eLife.15872.010 [file elife-15872-fig4-data1.xlsx]

## Sheet: Panel D-E
AMPA component (1 Hz MF modulation)
Charge after MF stimulation/ total charge	Phase shift	τ rise rebound current (s)	Phase shift converted to time delay(s)
0.809	138	0.093	0.384
0.822	175	0.064	0.486
0.732	138	0.066	0.386
0.768	-99	0.068	-0.275
0.916	176	0.096	0.488
0.545	-20	0.029	-0.057
0.591	136	0.054	0.378
0.763	132	0.053	0.367
0.526	26	0.061	0.073
0.788	173	0.063	0.482
0.593	99	0.031	0.276
0.627	112	0.055	0.311
0.851	195	0.099	0.543
0.621	80	0.031	0.223
0.862	208	0.098	0.578
0.793	160	0.045	0.445
0.558	-59	0.032	-0.166
0.547	51	0.028	0.144
0.349	-70	0.033	-0.196
0.579	49	0	0.137
0.620	68	0	0.189
0.495	-86	0.033	-0.239

## Sheet: Panel G
AMPA component (1 Hz MF modulation)
Control		Cyclothiazide
Modulated amplitude (Hz)	Phase shift	Modulated amplitude (Hz)	Phase shift
32	173	20	-41
10	99	9	-51
35	146	15	-83
4	189	5	-96
8	118	3	-61
5	191	2	7
2	78	4	-88
			²

## Sheet: Panel I
AMPA component
MF modulation 03 Hz		MF modulation 1 Hz		MF modulation 3 Hz
Modulated amplitude Hz	phase shift	Modulated amplitude Hz	phase shift	Modulated amplitude Hz	phase shift
117.975	138.823	220	4.54665	22.6245	31.2421
48.4067	138.49	228	8.19003	19.3563	16.9637
149.246	175.265	234	6.88918	16.8404	23.1974
100.172	138.976	204	2.61179	21.1792	21.6251
51.6573	49.379	231	5.46729	9.78261	23.0628
55.9811	196	270	5.75908	6.67341	7.23433
25.796	68.2248	104.076	1.56086	4.55722	4.38375
10.42	80.2906	188	8.00193	15.4905	2.15225
152.492	209	323	1.92576	5.22152	8.64228
-53.381	176.035	-110.187	17.7767	2.00837	5.31914
-2.77238	136.426	211	8.39201	9.09399	17.5429
70.1961	132.413	203	3.98893	9.47767	28.9023
185	160.236	295	4.78169	3.90959	12.79
-62.9976	-59.8513	-17.5748	1.71695	7.73108	4.48986
24.863	26.3185	62.7449	2.31446	1.6454	2.04229
-75.9162	-20.5891	-11.1911	1.5715	8.21327	32.4414
-63.7727	51.9066	221	1.74371	9.28974	7.03259
83.4043	173.561	202	9.22685	25.3041	9.51484
56.6415	99.5892	229	0.871623	11.4884	7.55042
